# Supplementary material for: Simultaneous CO2 and SO2 capture by using ionic liquids: a theoretical approach
Source: Royal Society of Chemistry journal article supplement (doi:10.1039/c6cp08151g), 2017-01-01
Supplement: c6cp08151g1.pdf [file c6cp08151g1.pdf]

## Electronic Supplementary Information

### Simultaneous CO<sub>2</sub> and SO<sub>2</sub> capture by using ionic liquids: a theoretical approach

Gregorio García,<sup>a</sup> Mert Atilhan,<sup>\*b</sup> Santiago Aparicio<sup>\*a</sup>

<sup>a</sup> Department of Chemistry, University of Burgos, 09001 Burgos, Spain

<sup>b</sup> Department of Chemical Engineering, Qatar University, P.O. Box 2713, Doha, Qatar

\*Corresponding authors: e-mail: [sapar@ubu.es](mailto:sapar@ubu.es) and [mert.atilhan@qu.edu.qa](mailto:mert.atilhan@qu.edu.qa) (M.A.)

Table S1 Optimized values for the main molecular parameters related with intermolecular interactions of IL1 related systems. AIM properties for those critical points (BCP, RCP and CCP) related with intermolecular interactions are also collected. See Fig. S2 for labeling.

| Intermolecular distances                      | Length/<br>Å | $\rho$ / a.u. | $\nabla^2\rho$ /<br>a.u. | RCPs/<br>CCPs <sup>a</sup> | $\rho$ / a.u. | $\nabla^2\rho$ /<br>a.u. |
|-----------------------------------------------|--------------|---------------|--------------------------|----------------------------|---------------|--------------------------|
| IL1. [EMIM][Et <sub>2</sub> PO <sub>4</sub> ] |              |               |                          |                            |               |                          |
| a <sub>11</sub>                               | 1.822        | 0.0532        | 0.0368                   | $\Sigma$ (RCP)             | 0.0123        | 0.0575                   |
| a <sub>12</sub>                               | 2.397        | 0.0116        | 0.0111                   |                            |               |                          |
| a <sub>13</sub>                               | 1.994        | 0.0254        | 0.0237                   |                            |               |                          |
| IL1...CO <sub>2</sub>                         |              |               |                          |                            |               |                          |
| a <sub>11</sub>                               | 1.974        | 0.0275        | 0.0806                   | $\Sigma$ (RCP)             | 0.0386        | 0.1722                   |
| a <sub>12</sub>                               | 2.394        | 0.0120        | 0.0393                   | $\Sigma$ (CCP)             | 0.0018        | 0.0076                   |
| a <sub>13</sub>                               | 2.164        | 0.0173        | 0.0542                   |                            |               |                          |
| b <sub>11</sub>                               | 2.881        | 0.0087        | 0.0382                   |                            |               |                          |
| b <sub>12</sub>                               | 2.738        | 0.0130        | 0.0496                   |                            |               |                          |
| c <sub>11</sub>                               | 2.171        | 0.0063        | 0.0221                   |                            |               |                          |
| IL1...SO <sub>2</sub>                         |              |               |                          |                            |               |                          |
| a <sub>11</sub>                               | 1.982        | 0.0266        | 0.0783                   | $\Sigma$ (RCP)             | 0.0671        | 0.2812                   |
| a <sub>12</sub>                               | 2.483        | 0.0100        | 0.0346                   | $\Sigma$ (CCP)             | 0.0082        | 0.0392                   |
| a <sub>13</sub>                               | 2.537        | 0.0088        | 0.0311                   |                            |               |                          |
| d <sub>11</sub>                               | 2.224        | 0.0568        | 0.1449                   |                            |               |                          |
| e <sub>11</sub>                               | 2.470        | 0.0075        | 0.0273                   |                            |               |                          |
| e <sub>12</sub>                               | 3.124        | 0.0104        | 0.0376                   |                            |               |                          |
| CO <sub>2</sub> ...IL1...SO <sub>2</sub>      |              |               |                          |                            |               |                          |
| a <sub>11</sub>                               | 2.007        | 0.0253        | 0.0739                   | $\Sigma$ (RCP)             | 0.0624        | 0.2635                   |
| a <sub>11'</sub>                              | 2.600        | 0.0103        | 0.0417                   | $\Sigma$ (CCP)             | 0.0116        | 0.0552                   |
| a <sub>12</sub>                               | 2.625        | 0.0077        | 0.0282                   |                            |               |                          |
| a <sub>13</sub>                               | 2.503        | 0.0095        | 0.0329                   |                            |               |                          |
| b <sub>11</sub>                               | 2.664        | 0.0136        | 0.0564                   |                            |               |                          |
| c <sub>11</sub>                               | 2.652        | 0.0062        | 0.0260                   |                            |               |                          |
| d <sub>11</sub>                               | 2.279        | 0.0527        | 0.1394                   |                            |               |                          |
| e <sub>11</sub>                               | 2.455        | 0.0106        | 0.0382                   |                            |               |                          |
| e <sub>12</sub>                               | 3.150        | 0.0071        | 0.0259                   |                            |               |                          |

<sup>a</sup>  $\Sigma$ (RCP) /  $\Sigma$ (CCP) represents the sum of  $\rho$  or  $\nabla^2\rho$  for those RCPs /CCPs related with intermolecular interactions.

Table S2 Optimized values for the main molecular parameters related with intermolecular interactions of IL2 related systems. AIM properties for those critical points (BCP, RCP and CCP) related with intermolecular interactions are also collected. See Fig. 1 for labeling.

| Intermolecular distances                 | Length/<br>Å | $\rho$ / a.u. | $\nabla^2\rho$ /<br>a.u. | RCPs/<br>CCPs <sup>a</sup> | $\rho$ / a.u. | $\nabla^2\rho$ /<br>a.u. |
|------------------------------------------|--------------|---------------|--------------------------|----------------------------|---------------|--------------------------|
| IL2. [EMIM][Ac]                          |              |               |                          |                            |               |                          |
| a <sub>21</sub>                          | 1.649        | 0.0552        | 0.1419                   | $\Sigma$ (RCP)             | 0.0134        | 0.0622                   |
| a <sub>22</sub>                          | 2.347        | 0.0116        | 0.0391                   |                            |               |                          |
| a <sub>23</sub>                          | 2.009        | 0.0240        | 0.0681                   |                            |               |                          |
| IL2...CO <sub>2</sub>                    |              |               |                          |                            |               |                          |
| a <sub>21</sub>                          | 1.865        | 0.0352        | 0.0968                   | $\Sigma$ (RCP)             | 0.0447        | 0.2017                   |
| a <sub>22</sub>                          | 2.404        | 0.0117        | 0.0368                   | $\Sigma$ (CCP)             | 0.2035        | 0.0102                   |
| a <sub>23</sub>                          | 2.307        | 0.0129        | 0.0420                   |                            |               |                          |
| b <sub>21</sub>                          | 2.608        | 0.0156        | 0.0613                   |                            |               |                          |
| c <sub>21</sub>                          | 3.310        | 0.0050        | 0.0180                   |                            |               |                          |
| c <sub>22</sub>                          | 2.589        | 0.0070        | 0.0269                   |                            |               |                          |
| IL2...SO <sub>2</sub>                    |              |               |                          |                            |               |                          |
| a <sub>21</sub>                          | 2.028        | 0.0246        | 0.0683                   | $\Sigma$ (RCP)             | 0.0655        | 0.2777                   |
| a <sub>22</sub>                          | 2.663        | 0.0068        | 0.0261                   | $\Sigma$ (CCP)             | 0.0182        | 0.0803                   |
| d <sub>21</sub>                          | 2.069        | 0.0845        | 0.1459                   |                            |               |                          |
| d <sub>22</sub>                          | 2.702        | 0.0073        | 0.0266                   |                            |               |                          |
| e <sub>21</sub>                          | 3.324        | 0.0063        | 0.0225                   |                            |               |                          |
| e <sub>22</sub>                          | 2.276        | 0.0142        | 0.0457                   |                            |               |                          |
| CO <sub>2</sub> ...IL2...SO <sub>2</sub> |              |               |                          |                            |               |                          |
| a <sub>21</sub>                          | 2.205        | 0.0167        | 0.0480                   | $\Sigma$ (RCP)             | 0.0701        | 0.2983                   |
| a <sub>22</sub>                          | 2.374        | 0.0124        | 0.0372                   | $\Sigma$ (CCP)             | 0.0051        | 0.0219                   |
| a <sub>23</sub>                          | 2.386        | 0.0118        | 0.0403                   |                            |               |                          |
| b <sub>21</sub>                          | 2.927        | 0.0084        | 0.0343                   |                            |               |                          |
| c <sub>21</sub>                          | 2.511        | 0.0076        | 0.0290                   |                            |               |                          |
| c <sub>22</sub>                          | 2.386        | 0.0106        | 0.0364                   |                            |               |                          |
| d <sub>21</sub>                          | 2.075        | 0.0827        | 0.1487                   |                            |               |                          |
| e <sub>21</sub>                          | 3.077        | 0.0087        | 0.0277                   |                            |               |                          |
| e <sub>22</sub>                          | 2.810        | 0.0075        | 0.0286                   |                            |               |                          |

<sup>a</sup>  $\Sigma$ (RCP) /  $\Sigma$ (CCP) represents the sum of  $\rho$  or  $\nabla^2\rho$  for those RCPs /CCPs related with intermolecular interactions.

Table S3 Optimized values for the main molecular parameters related with intermolecular interactions of IL3 related systems. AIM properties for those critical points (BCP, RCP and CCP) related with intermolecular interactions are also collected. See Fig. S3 for labeling.

| Intermolecular distances                      | Length/<br>Å | $\rho$ / a.u. | $\nabla^2\rho$ /<br>a.u. | RCPs/<br>CCPs <sup>a</sup> | $\rho$ / a.u. | $\nabla^2\rho$ /<br>a.u. |
|-----------------------------------------------|--------------|---------------|--------------------------|----------------------------|---------------|--------------------------|
| IL3. [EMIM][SO <sub>3</sub> CF <sub>3</sub> ] |              |               |                          |                            |               |                          |
| a <sub>31</sub>                               | 2.446        | 0.0124        | 0.0472                   | $\Sigma$ (RCP)             | 0.0243        | 0.1020                   |
| a <sub>32</sub>                               | 2.419        | 0.0116        | 0.0398                   | $\Sigma$ (CCP)             | 0.0042        | 0.0186                   |
| a <sub>33</sub>                               | 2.205        | 0.0167        | 0.0515                   |                            |               |                          |
| a <sub>34</sub>                               | 2.465        | 0.0101        | 0.0330                   |                            |               |                          |
| IL3...CO <sub>2</sub>                         |              |               |                          |                            |               |                          |
| a <sub>31</sub>                               | 2.306        | 0.0158        | 0.0558                   | $\Sigma$ (RCP)             | 0.0872        | 0.5851                   |
| a <sub>32</sub>                               | 2.449        | 0.0111        | 0.0382                   |                            |               |                          |
| a <sub>33</sub>                               | 2.372        | 0.0117        | 0.0371                   |                            |               |                          |
| a <sub>34</sub>                               | 2.252        | 0.0144        | 0.0463                   |                            |               |                          |
| b <sub>31</sub>                               | 2.895        | 0.0090        | 0.0379                   |                            |               |                          |
| b <sub>32</sub>                               | 3.256        | 0.0031        | 0.0167                   |                            |               |                          |
| c <sub>31</sub>                               | 3.110        | 0.0069        | 0.0255                   |                            |               |                          |
| c <sub>32</sub>                               | 2.696        | 0.0068        | 0.0279                   |                            |               |                          |
| IL3...SO <sub>2</sub>                         |              |               |                          |                            |               |                          |
| a <sub>31</sub>                               | 2.070        | 0.0220        | 0.0664                   | $\Sigma$ (RCP)             | 0.0469        | 0.2031                   |
| a <sub>32</sub>                               | 2.530        | 0.0090        | 0.0316                   | $\Sigma$ (CCP)             | 0.0019        | 0.0073                   |
| a <sub>33</sub>                               | 2.687        | 0.0062        | 0.0221                   |                            |               |                          |
| a <sub>34</sub>                               | 2.686        | 0.0065        | 0.0250                   |                            |               |                          |
| d <sub>31</sub>                               | 2.506        | 0.0322        | 0.0972                   |                            |               |                          |
| e <sub>31</sub>                               | 3.195        | 0.0069        | 0.0242                   |                            |               |                          |
| e <sub>32</sub>                               | 2.653        | 0.0106        | 0.0378                   |                            |               |                          |
| e <sub>33</sub>                               | 2.419        | 0.0068        | 0.0256                   |                            |               |                          |
| CO <sub>2</sub> ...IL3...SO <sub>2</sub>      |              |               |                          |                            |               |                          |
| a <sub>31</sub>                               | 2.158        | 0.0187        | 0.0580                   | $\Sigma$ (RCP)             | 0.0321        | 0.1382                   |
| a <sub>32</sub>                               | 2.577        | 0.0082        | 0.0298                   | $\Sigma$ (CCP)             | 0.0019        | 0.0073                   |
| a <sub>33</sub>                               | 2.748        | 0.0055        | 0.0198                   |                            |               |                          |
| a <sub>34</sub>                               | 2.621        | 0.0072        | 0.0274                   |                            |               |                          |
| b <sub>31</sub>                               | 2.751        | 0.0111        | 0.0475                   |                            |               |                          |
| b <sub>32</sub>                               | 2.497        | 0.0080        | 0.0310                   |                            |               |                          |
| d <sub>31</sub>                               | 2.537        | 0.0302        | 0.0919                   |                            |               |                          |
| e <sub>31</sub>                               | 3.251        | 0.0068        | 0.0231                   |                            |               |                          |
| e <sub>32</sub>                               | 2.718        | 0.0060        | 0.0231                   |                            |               |                          |
| e <sub>33</sub>                               | 2.460        | 0.0099        | 0.0359                   |                            |               |                          |

<sup>a</sup>  $\Sigma$ (RCP) /  $\Sigma$ (CCP) represents the sum of  $\rho$  or  $\nabla^2\rho$  for those RCPs /CCPs related with intermolecular interactions.

Table S4 Optimized values for the main molecular parameters related with intermolecular interactions of IL4 related systems. AIM properties for those critical points (BCP, RCP and CCP) related with intermolecular interactions are also collected. See Fig. S4 for labeling.

| Intermolecular distances                 | Length/<br>Å | $\rho$ / a.u. | $\nabla^2\rho$ /<br>a.u. | RCPs/<br>CCPs <sup>a</sup> | $\rho$ / a.u. | $\nabla^2\rho$ /<br>a.u. |
|------------------------------------------|--------------|---------------|--------------------------|----------------------------|---------------|--------------------------|
| IL4. [EMIM][DCA]                         |              |               |                          |                            |               |                          |
| a <sub>41</sub>                          | 2.143        | 0.0334        | 0.0759                   | $\Sigma$ (RCP)             | 0.0162        | 0.064                    |
| a <sub>42</sub>                          | 2.775        | 0.0156        | 0.0497                   |                            |               |                          |
| a <sub>43</sub>                          | 2.293        | 0.0071        | 0.0255                   |                            |               |                          |
| a <sub>44</sub>                          | 2.786        | 0.0055        | 0.0200                   |                            |               |                          |
| a <sub>45</sub>                          | 2.474        | 0.0202        | 0.0595                   |                            |               |                          |
| IL4...CO <sub>2</sub>                    |              |               |                          |                            |               |                          |
| a <sub>41</sub>                          | 2.430        | 0.0123        | 0.0374                   | $\Sigma$ (RCP)             | 0.0097        | 0.0387                   |
| a <sub>42</sub>                          | 2.182        | 0.0186        | 0.0535                   |                            |               |                          |
| a <sub>43</sub>                          | 2.233        | 0.0164        | 0.0479                   |                            |               |                          |
| b <sub>41</sub>                          | 2.949        | 0.0089        | 0.0344                   |                            |               |                          |
| IL4...SO <sub>2</sub>                    |              |               |                          |                            |               |                          |
| a <sub>45</sub>                          | 2.591        | 0.0087        | 0.0326                   | $\Sigma$ (RCP)             | 0.0279        | 0.1071                   |
| a <sub>43</sub>                          | 2.318        | 0.0143        | 0.0434                   | $\Sigma$ (CCP)             | 0.0050        | 0.0205                   |
| a <sub>42</sub>                          | 2.430        | 0.0117        | 0.0375                   |                            |               |                          |
| d <sub>41</sub>                          | 2.452        | 0.0435        | 0.0988                   |                            |               |                          |
| e <sub>41</sub>                          | 3.093        | 0.0079        | 0.0263                   |                            |               |                          |
| e <sub>42</sub>                          | 2.494        | 0.0083        | 0.0304                   |                            |               |                          |
| e <sub>43</sub>                          | 2.474        | 0.0099        | 0.0369                   |                            |               |                          |
| CO <sub>2</sub> ...IL4...SO <sub>2</sub> |              |               |                          |                            |               |                          |
| a <sub>41</sub>                          | 2.678        | 0.0093        | 0.0342                   | $\Sigma$ (RCP)             | 0.0271        | 0.1043                   |
| a <sub>43</sub>                          | 2.344        | 0.0137        | 0.0418                   | $\Sigma$ (CCP)             | 0.0048        | 0.0199                   |
| a <sub>44</sub>                          | 2.507        | 0.0105        | 0.0333                   |                            |               |                          |
| b <sub>41</sub>                          | 2.885        | 0.0096        | 0.0390                   |                            |               |                          |
| d <sub>41</sub>                          | 2.463        | 0.0423        | 0.0980                   |                            |               |                          |
| e <sub>41</sub>                          | 3.107        | 0.0077        | 0.0256                   |                            |               |                          |
| e <sub>42</sub>                          | 2.504        | 0.0081        | 0.0297                   |                            |               |                          |
| e <sub>43</sub>                          | 2.464        | 0.0099        | 0.0371                   |                            |               |                          |

<sup>a</sup>  $\Sigma$ (RCP) /  $\Sigma$ (CCP) represents the sum of  $\rho$  or  $\nabla^2\rho$  for those RCPs /CCPs related with intermolecular interactions.

Table S5 Optimized values for the main molecular parameters related with intermolecular interactions of IL5 related systems. AIM properties for those critical points (BCP, RCP and CCP) related with intermolecular interactions are also collected. See Fig. S5 for labeling.

| Intermolecular distances                 | Length/<br>Å | $\rho$ / a.u. | $\nabla^2\rho$ /<br>a.u. | RCPs/<br>CCPs <sup>a</sup> | $\rho$ / a.u. | $\nabla^2\rho$ /<br>a.u. |
|------------------------------------------|--------------|---------------|--------------------------|----------------------------|---------------|--------------------------|
| IL5. [EMIM][Cl]                          |              |               |                          |                            |               |                          |
| a <sub>51</sub>                          | 1.987        | 0.0433        | 0.0793                   | $\Sigma$ (RCP)             | 0.0081        | 0.0343                   |
| a <sub>52</sub>                          | 2.673        | 0.0112        | 0.0334                   |                            |               |                          |
| IL5...CO <sub>2</sub>                    |              |               |                          |                            |               |                          |
| a <sub>51</sub>                          | 2.078        | 0.0373        | 0.0762                   | $\Sigma$ (RCP)             | 0.0125        | 0.0538                   |
| a <sub>52</sub>                          | 2.683        | 0.0117        | 0.0362                   |                            |               |                          |
| b <sub>51</sub>                          | 3.118        | 0.0100        | 0.0368                   |                            |               |                          |
| c <sub>51</sub>                          | 2.687        | 0.0064        | 0.0257                   |                            |               |                          |
| c <sub>52</sub>                          | 2.693        | 0.0373        | 0.0762                   |                            |               |                          |
| IL5...SO <sub>2</sub>                    |              |               |                          |                            |               |                          |
| a <sub>51</sub>                          | 2.405        | 0.0188        | 0.0543                   | $\Sigma$ (RCP)             | 0.0271        | 0.1115                   |
| a <sub>52</sub>                          | 2.720        | 0.0105        | 0.0342                   |                            |               |                          |
| d <sub>51</sub>                          | 2.557        | 0.0504        | 0.0914                   |                            |               |                          |
| e <sub>51</sub>                          | 2.953        | 0.0100        | 0.0334                   |                            |               |                          |
| e <sub>52</sub>                          | 2.355        | 0.0116        | 0.0382                   |                            |               |                          |
| e <sub>53</sub>                          | 2.201        | 0.0161        | 0.0501                   |                            |               |                          |
| CO <sub>2</sub> ...IL5...SO <sub>2</sub> |              |               |                          |                            |               |                          |
| a <sub>51</sub>                          | 2.631        | 0.0122        | 0.0415                   | $\Sigma$ (RCP)             | 0.0428        | 0.1707                   |
| a <sub>52</sub>                          | 2.688        | 0.0110        | 0.0366                   | $\Sigma$ (CCP)             | 0.0034        | 0.0135                   |
| b <sub>51</sub>                          | 3.291        | 0.0068        | 0.0267                   |                            |               |                          |
| c <sub>51</sub>                          | 2.414        | 0.0092        | 0.0333                   |                            |               |                          |
| c <sub>52</sub>                          | 2.416        | 0.0099        | 0.0345                   |                            |               |                          |
| d <sub>51</sub>                          | 2.551        | 0.0510        | 0.0919                   |                            |               |                          |
| e <sub>51</sub>                          | 3.091        | 0.0095        | 0.0329                   |                            |               |                          |
| e <sub>52</sub>                          | 2.450        | 0.0098        | 0.0333                   |                            |               |                          |
| e <sub>53</sub>                          | 2.564        | 0.0097        | 0.0368                   |                            |               |                          |
| f <sub>51</sub>                          | 2.917        | 0.0122        | 0.0415                   |                            |               |                          |

<sup>a</sup>  $\Sigma$ (RCP) /  $\Sigma$ (CCP) represents the sum of  $\rho$  or  $\nabla^2\rho$  for those RCPs /CCPs related with intermolecular interactions.

Table S6 Released energies for different processes related with acid gas removal by IL2. Units are in kcal mol<sup>-1</sup>.

|                                                                                                 | Gaussian 09                | ORCA                                              | Difference |
|-------------------------------------------------------------------------------------------------|----------------------------|---------------------------------------------------|------------|
|                                                                                                 | $\omega$ B97XD/6-31+G(d,p) | $\omega$ B97X-D3/6-31+G(d,p) //<br>B3LYP/6-31G(d) |            |
| [EMIM] <sup>+</sup> + [Ac] <sup>-</sup> → [EMIM][Ac]                                            | 102.76                     | 104.04                                            | 1.28       |
| [EMIM][Ac] + CO <sub>2</sub> →<br>[EMIM][Ac]⋯CO <sub>2</sub>                                    | 5.70                       | 6.44                                              | 0.74       |
| [EMIM][Ac] + SO <sub>2</sub> →<br>[EMIM][Ac]⋯SO <sub>2</sub>                                    | 18.51                      | 21.93                                             | 3.42       |
| [EMIM][Ac] + CO <sub>2</sub> + SO <sub>2</sub> →<br>CO <sub>2</sub> ⋯[EMIM][Ac]⋯SO <sub>2</sub> | 23.30                      | 27.88                                             | 4.58       |
| [EMIM][Ac]⋯SO <sub>2</sub> + CO <sub>2</sub> →<br>CO <sub>2</sub> ⋯[EMIM][Ac]⋯SO <sub>2</sub>   | 4.72                       | 5.86                                              | 1.14       |
| [EMIM][Ac]⋯CO <sub>2</sub> + SO <sub>2</sub> →<br>CO <sub>2</sub> ⋯[EMIM][Ac]⋯SO <sub>2</sub>   | 17.53                      | 21.34                                             | 3.81       |

Table S7 Main molecular parameters related with intermolecular interactions of IL2 related systems computed at  $\omega$ B97X-D3/6-31+G(d,p) // B3LYP/6-31G(d) theoretical level. AIM properties for those critical points (BCP, RCP and CCP) related with intermolecular interactions are also collected. See Fig. 1 for labeling.

| Intermolecular distances                 | Length/<br>Å | $\rho$ / a.u. | $\nabla^2\rho$ /<br>a.u. | RCPs/<br>CCPs <sup>a</sup> | $\rho$ / a.u. | $\nabla^2\rho$ /<br>a.u. |
|------------------------------------------|--------------|---------------|--------------------------|----------------------------|---------------|--------------------------|
| IL2. [EMIM][Ac]                          |              |               |                          |                            |               |                          |
| a <sub>21</sub>                          | 1.606        | 0.0611        | 0.1503                   | $\Sigma$ (RCP)             | 0.0134        | 0.0625                   |
| a <sub>22</sub>                          | 2.299        | 0.0129        | 0.0420                   |                            |               |                          |
| a <sub>23</sub>                          | 1.979        | 0.0257        | 0.0725                   |                            |               |                          |
| IL2...CO <sub>2</sub>                    |              |               |                          |                            |               |                          |
| a <sub>21</sub>                          | 1.784        | 0.0411        | 0.1135                   | $\Sigma$ (RCP)             | 0.0324        | 0.1471                   |
| a <sub>22</sub>                          | 2.431        | 0.0111        | 0.0350                   |                            |               |                          |
| a <sub>23</sub>                          | 2.327        | 0.0125        | 0.0396                   |                            |               |                          |
| b <sub>21</sub>                          | 2.586        | 0.0167        | 0.0633                   |                            |               |                          |
| c <sub>21</sub>                          | 3.352        | 0.0000        | 0.0000                   |                            |               |                          |
| c <sub>22</sub>                          | 2.619        | 0.0063        | 0.0243                   |                            |               |                          |
| IL2...SO <sub>2</sub>                    |              |               |                          |                            |               |                          |
| a <sub>21</sub>                          | 1.947        | 0.0277        | 0.0776                   | $\Sigma$ (RCP)             | 0.0533        | 0.2301                   |
| a <sub>22</sub>                          | 2.591        | 0.0078        | 0.0279                   |                            |               |                          |
| d <sub>21</sub>                          | 2.143        | 0.0717        | 0.1510                   |                            |               |                          |
| d <sub>22</sub>                          | 2.660        | 0.0076        | 0.0270                   |                            |               |                          |
| e <sub>21</sub>                          | 3.486        | 0.0054        | 0.0182                   |                            |               |                          |
| e <sub>22</sub>                          | 2.217        | 0.0160        | 0.0468                   |                            |               |                          |
| CO <sub>2</sub> ...IL2...SO <sub>2</sub> |              |               |                          |                            |               |                          |
| a <sub>21</sub>                          | 2.034        | 0.0236        | 0.0646                   | $\Sigma$ (RCP)             | 0.0489        | 0.2069                   |
| a <sub>22</sub>                          | 2.400        | 0.0118        | 0.0362                   | $\Sigma$ (CCP)             |               |                          |
| a <sub>23</sub>                          | 2.473        | 0.0098        | 0.0330                   |                            |               |                          |
| b <sub>21</sub>                          | 2.966        | 0.0077        | 0.0317                   |                            |               |                          |
| c <sub>21</sub>                          | 2.714        | 0.0056        | 0.0252                   |                            |               |                          |
| c <sub>22</sub>                          | 2.440        | 0.0087        | 0.0311                   |                            |               |                          |
| d <sub>21</sub>                          | 2.182        | 0.0656        | 0.1499                   |                            |               |                          |
| e <sub>21</sub>                          | 3.210        | 0.0066        | 0.0221                   |                            |               |                          |
| e <sub>22</sub>                          | 2.795        | 0.0061        | 0.0225                   |                            |               |                          |

<sup>a</sup>  $\Sigma$ (RCP) /  $\Sigma$ (CCP) represents the sum of  $\rho$  a  $\nabla^2\rho$  for those RCPs /CCPs related with intermolecular interactions.



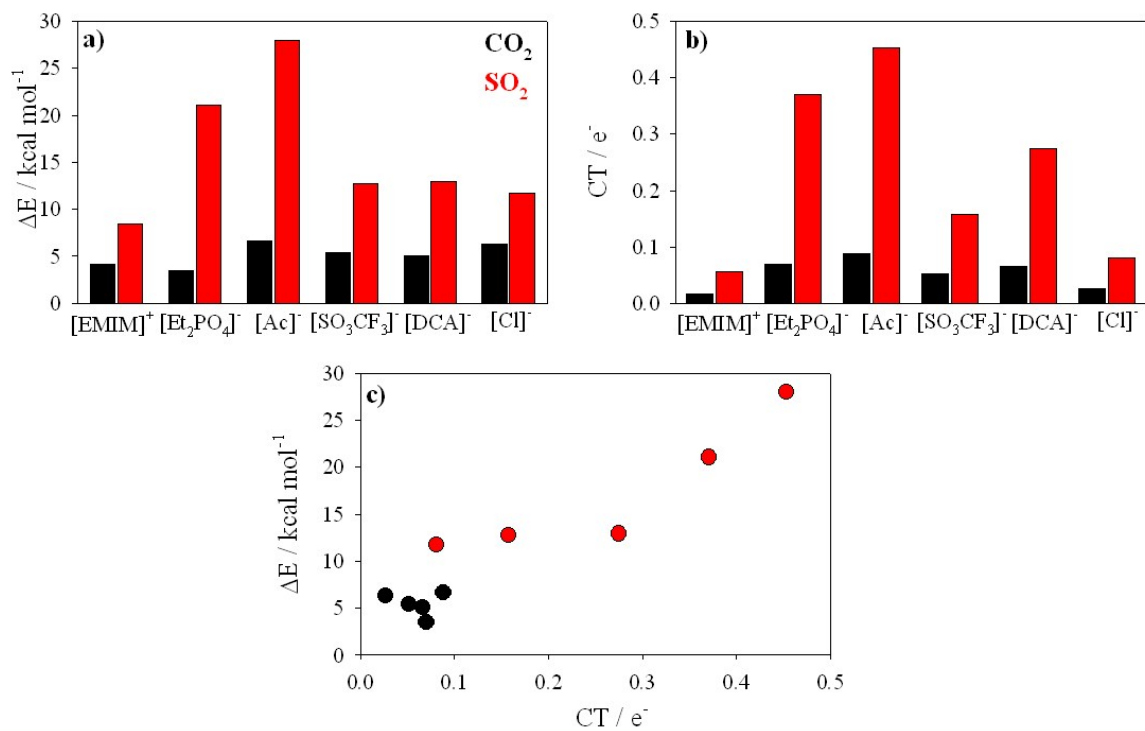

Fig. S1 a) Interaction energies for ion...XO<sub>2</sub> (X= C or S); b) Intermolecular CT for ion...XO<sub>2</sub> (X= C or S). For cation/anion...XO<sub>2</sub> (X= C or S) systems there is a CT process from the XO<sub>2</sub>/anion up to the cation/XO<sub>2</sub>, which stands for a positive/negative charge over XO<sub>2</sub> molecule; c) Interaction Energies vs intermolecular CT.

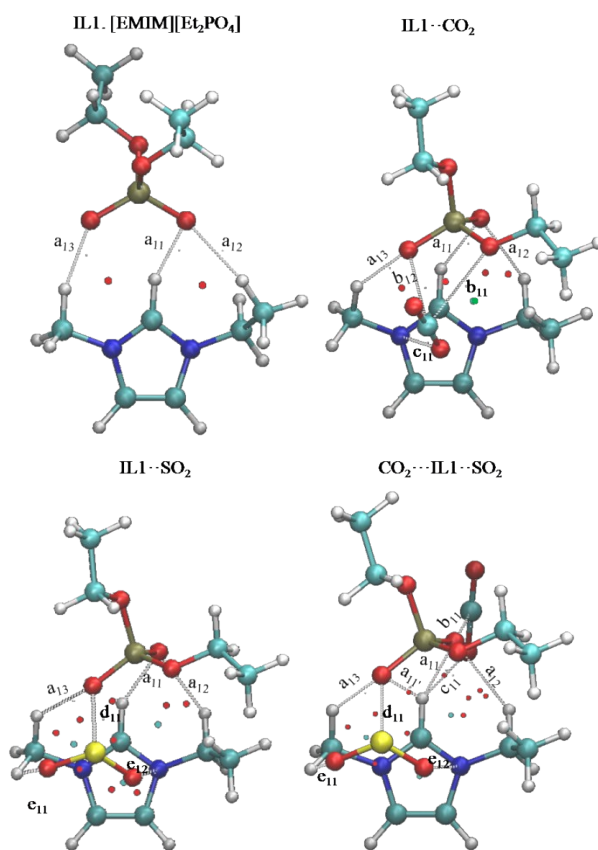

Fig. S2 Optimized structures of IL1 related systems, along to the main parameters related with interionic interactions. Carbon, Nitrogen, Oxygen, Sulphur and Phosphorous are represented in green, blue, red, yellow and brown, respectively. RCPs/CCPs are represented as red/green points. BCPs corresponding to intermolecular interactions were omitted for clarity.

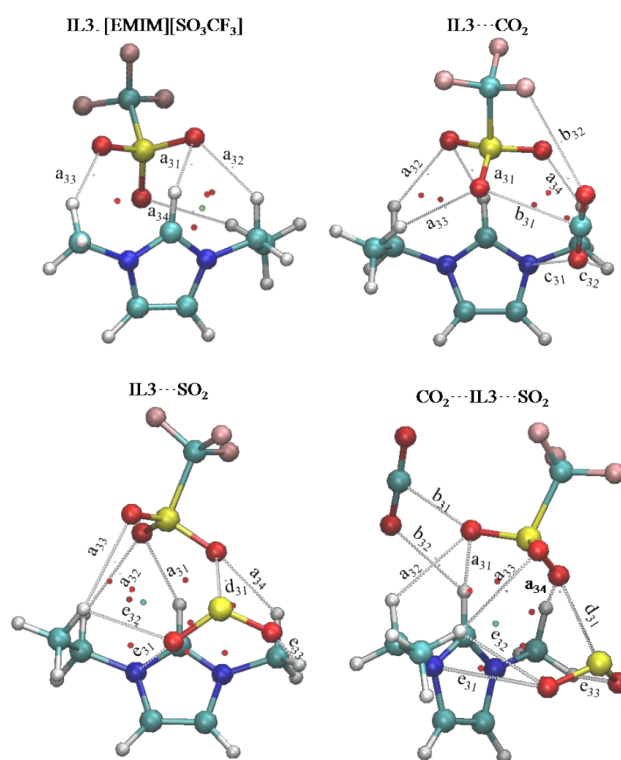

Fig. S3 Optimized structures of IL3 related systems, along to the main parameters related with interionic interactions. Carbon, Nitrogen, Oxygen, Sulphur and Fluorine are represented in green, blue, red, yellow and pink, respectively. RCPs/CCPs are represented as red/green points. BCPs corresponding to intermolecular interactions were omitted for clarity.

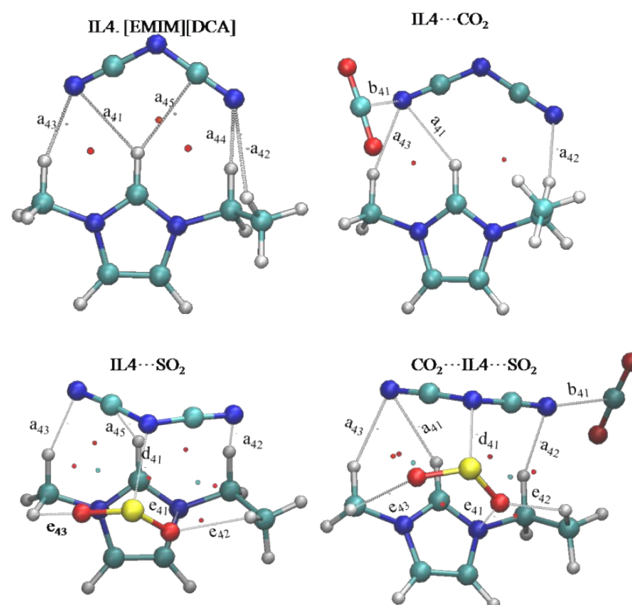

Fig. S4 Optimized structures of IL4 related systems, along to the main parameters related with interionic interactions. Carbon, Nitrogen, Oxygen and Sulphur are represented in green, blue, red and yellow, respectively. RCPs/CCPs are represented as red/green points. BCPs corresponding to intermolecular interactions were omitted for clarity.

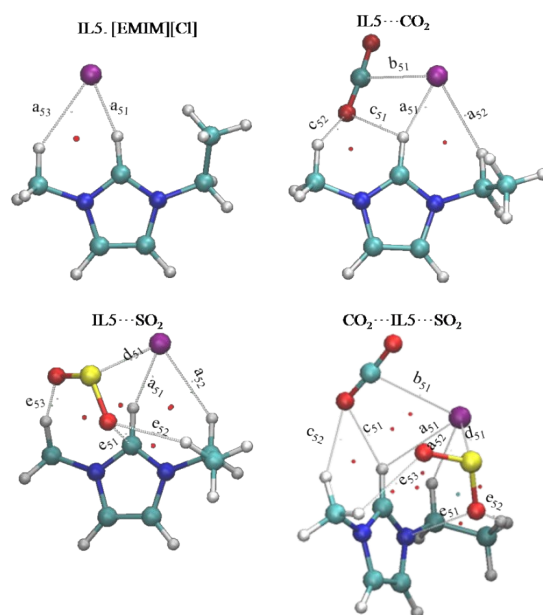

Fig. S5 Optimized structures of IL5 related systems, along to the main parameters related with interionic interactions. Carbon, Nitrogen, Oxygen, Sulphur and Chloride are represented in green, blue, red, yellow and purple, respectively. RCPs/CCPs are represented as red/green points. BCPs corresponding to intermolecular interactions were omitted for clarity.
